# Supplementary material
Source: publisher figshare collection journal article supplement (https://gsapubs.figshare.com/articles/dataset/_/22151903)
Supplement: Supplementary file 1 [file 1]

## Sheet: Sheet1
Table S1. Sample location, mineral assemblage and microstructure description
Sample type	Sample No.	Cpx	Brown Amp (%)	Green Amp (%)	Ab+Ep (%)		Ti-Fe oxides (%)	Amp type	Deformatin intensity	EBSD mapping area (mm)	step size (μm)	Coordinates
Type 1	YJ2008-2	10	25	20	40		5	Porphyroclast(50%)+Matrix(50%)	Weak foliation	1.2×3.0+6.0×15.5	6/20	N 29° 07′ 02.03″ E 88° 53′ 58.54″
	YJ2007-5									5.1×15.5	18	N 29° 06′ 56.56″ E 88° 53′ 57.46″
Type 2	YJ2003-1	<5	20	30	40		5	Porphyroclast(20%)+Matrix(80%)	Strong foliation	0.96×3.0	6	N 29° 06′ 57.82″ E 88° 54′ 46.04″
	YJ2002-3									6.8×14.5	25	N 29° 06′ 55.75″ E 88° 54′ 37.94″
Type 3	YJ2010-1	0	<5	55	35		5	Aggregation(40%)+Matrix(60%)	Strong foliation	1.2×1.6	3	N 29° 07′ 06.49″ E 88° 53′ 53.69″
	YJ2012-1									5.1×12.6	15	N 29° 07′ 10.52″ E 88° 54′ 00.96″

## Sheet: G50879
Zhou, B., et al., 2023, Shearing-enhanced deep fluid circulation induces seismic anisotropy in the lower crust at slow-spreading oceanic ridges: Geology, https://doi.org/10.1130/G50879.1
